# Supplementary material
Source: publisher figshare collection journal article supplement (https://karger.figshare.com/ndownloader/files/23136383)
Supplement: Supplementary file 1 [file 23136383]

**Supplementary Materials**


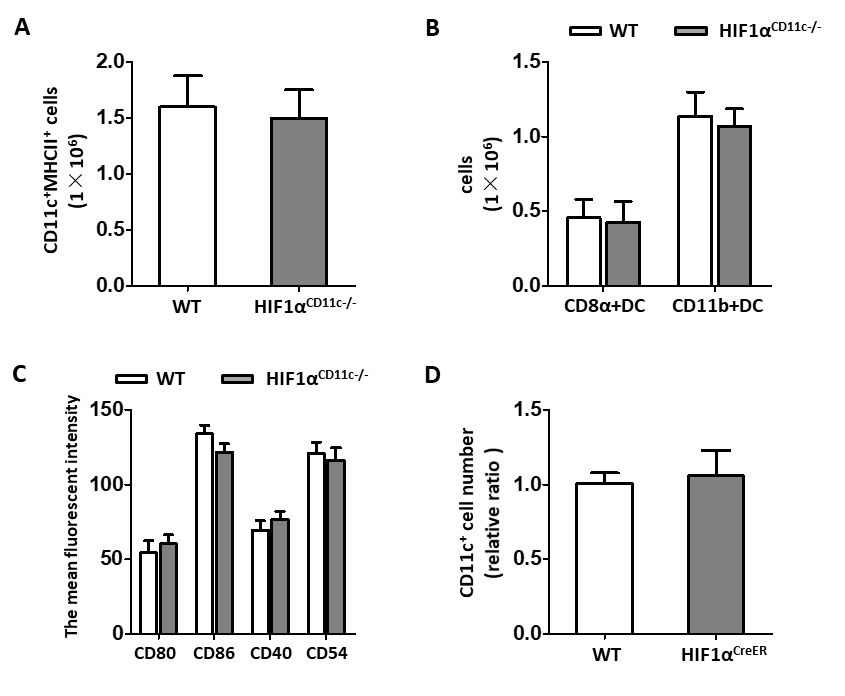


Figure S1. HIF1α deletion in DC does not affect the development and homeostasis of DCs. The absolute cell numbers of CD11c+MHC-II+DC (A) and CD8α+CD11c+MHCII+DC or CD11b+CD11c+MHCII+DC (B) in WT and *HIF1αCD11c-/-* mouse spleen were summarized. (C) The mean fluorescent intensity (MFI) was summarized for the mouse splenic DCs (CD11c+MHC-II+) phenotyping. Data are shown as mean ± SD, n=4-5, from one of two independent experiments. (C) WT or Sirt1CreER BM cells (input BM cells, 2 × 106) were cultured with GM-CSF, IL-4, with 4-OHT added at days 0, 1, 2, and 3, followed by measurement of CD11c+ DC number at day 10. Data are shown as mean ± SD, n=3 independent experiments.
